# Supplementary material for: All‐Solid‐State Planar Sodium‐Ion Microcapacitors with Multidirectional Fast Ion Diffusion Pathways
Source: PubMed Central journal article supplement (PMC6891900; doi:10.1002/advs.201902147), 2019-10-04
Supplement: ADVS-6-1902147-s001.pdf [file ADVS-6-1902147-s001.pdf]

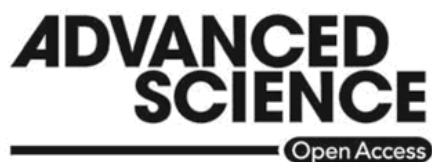

## Supporting Information

for *Adv. Sci.*, DOI: 10.1002/advs.201902147

All-Solid-State Planar Sodium-Ion Microcapacitors  
with Multidirectional Fast Ion Diffusion Pathways

*Shuanghao Zheng, Sen Wang, Yanfeng Dong, Feng Zhou,  
Jieqiong Qin, Xiao Wang, Feng Su, Chenglin Sun, Zhong-  
Shuai Wu,\* Hui-Ming Cheng, and Xinhe Bao*

## Supporting Information

### All-Solid-State Planar Sodium Ion Micro-Capacitors with Multi-Directional Fast Ion Diffusion Pathways

*Shuanghao Zheng, Sen Wang, Yanfeng Dong, Feng Zhou, Jieqiong Qin, Xiao Wang, Feng Su, Chenglin Sun, Zhong-Shuai Wu,\* Hui-Ming Cheng, and Xinhe Bao*

Mr. S. Zheng, Ms. S. Wang, Dr. Y. Dong, Dr. F. Zhou, Ms. J. Qin, Ms. X. Wang, Mr. F. Su, Prof. C. Sun, Prof. Z.-S. Wu, Prof. X. Bao  
Dalian National Laboratory for Clean Energy  
Dalian Institute of Chemical Physics, Chinese Academy of Sciences  
457 Zhongshan Road, Dalian 116023, China  
E-mail: wuzs@dicp.ac.cn

Mr. S. Zheng, Prof. X. Bao  
State Key Laboratory of Catalysis  
Dalian Institute of Chemical Physics, Chinese Academy of Sciences  
457 Zhongshan Road, Dalian 116023, China

Prof. H.-M. Cheng  
Shenyang National Laboratory for Materials Science, Institute of Metal Research, Chinese Academy of Sciences, 72 Wenhua Road, Shenyang 110016, China

Prof. H.-M. Cheng  
Shenzhen Geim Graphene Center, Tsinghua-Berkeley Shenzhen Institute, 1001 Xueyuan Road, Shenzhen 518055, China

Mr. S. Zheng, Ms. S. Wang, Ms. J. Qin, Ms. X. Wang, Mr. F. Su  
University of Chinese Academy of Sciences  
19 A Yuquan Rd, Shijingshan District, Beijing 100049, China

### Calculation

The specific areal capacitance and volumetric capacitance of NIMCs were evaluated through GCD profiles via the following equations (1) and (2):

$$C_{area} = \frac{It}{\Delta U A_{device}} \quad (1)$$

$$C_{volume} = \frac{It}{\Delta U V_{device}} \quad (2)$$

Where  $C_{area}$  (mF cm<sup>-2</sup>) and  $C_{volume}$  (F cm<sup>-3</sup>) are the calculated areal capacitance and volumetric capacitance, respectively.  $I$  (mA) is the discharge current.  $t$  (s) is the discharge time.  $\Delta U$  (V) is the potential difference.  $A_{device}$  (cm<sup>2</sup>) and  $V_{device}$  (cm<sup>3</sup>) are the area and volume of two electrodes, respectively.

The volumetric energy density and power density of NIMCs were calculated by the formula (2) and (3):

$$E_{volume} = \frac{\int I U dt}{V_{device}} \quad (3)$$

$$P_{volume} = \frac{E_{volume}}{t} \times 3600 \quad (4)$$

Where  $U$  is potential (V),  $E_{volume}$  is volumetric energy density (mWh cm<sup>-3</sup>),  $P_{volume}$  is volumetric power density (mW cm<sup>-3</sup>).

The areal energy density and power density of NIMCs were evaluated by the equations (5) and (6):

$$E_{area} = \frac{\int I U dt}{A_{area}} \quad (5)$$

$$P_{area} = \frac{E_{area}}{t} \times 3600 \quad (6)$$

Where  $U$  is potential (V),  $E_{area}$  is volumetric energy density ( $\mu$ Wh cm<sup>-2</sup>),  $P_{area}$  is volumetric power density (mW cm<sup>-2</sup>).

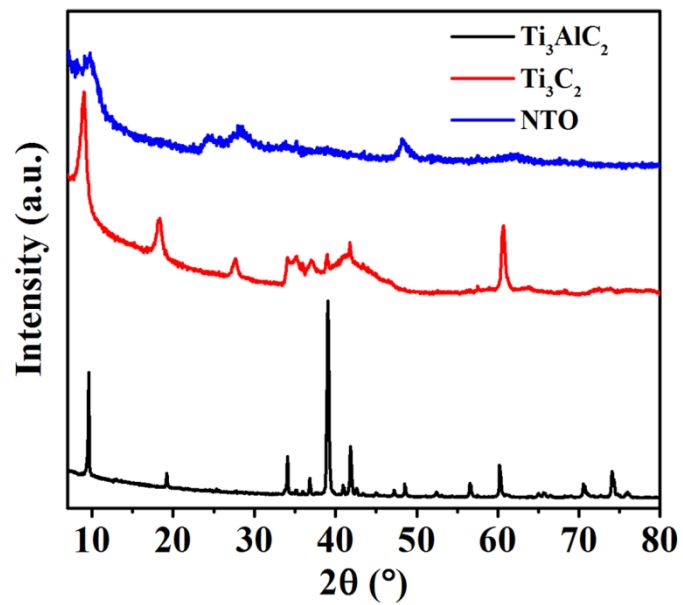

**Figure S1.** XRD patterns of  $\text{Ti}_3\text{AlC}_2$ ,  $\text{Ti}_3\text{C}_2$  and NTO.

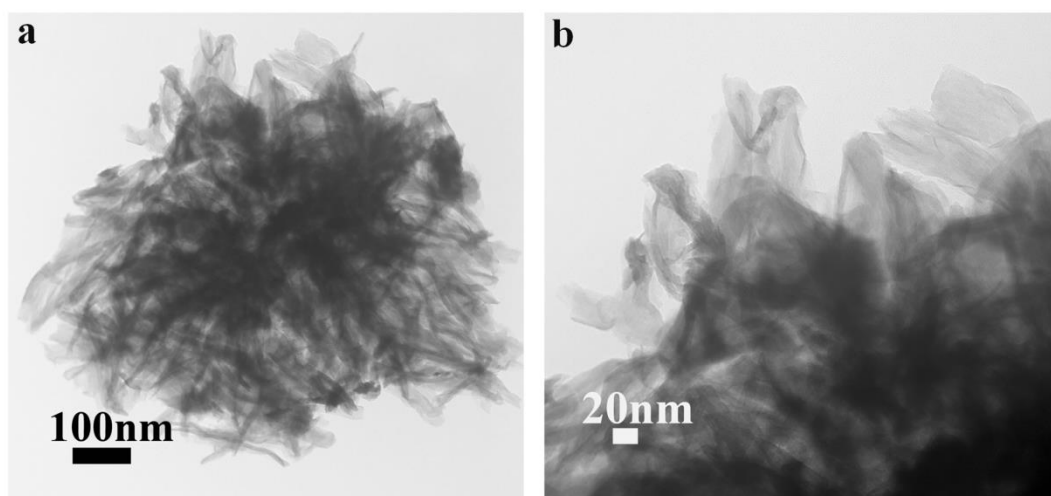

**Figure S2.** TEM images of NTO with low (a) and high (b) magnification.

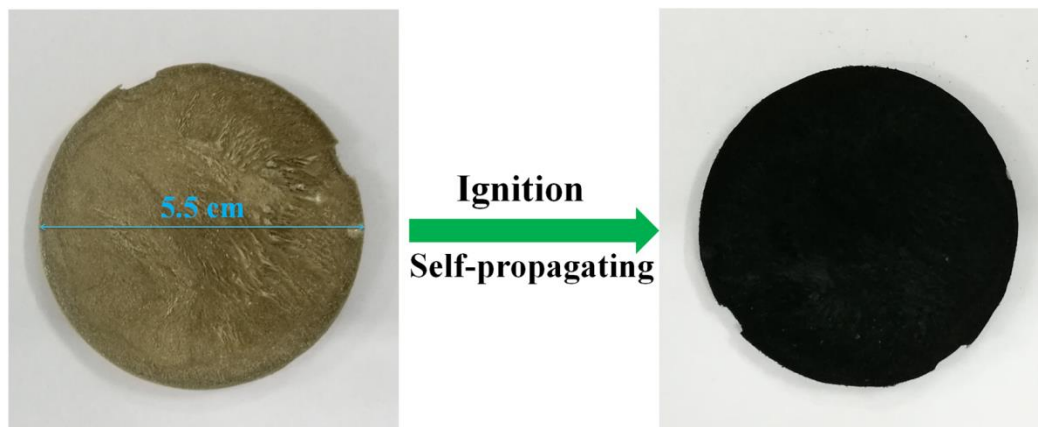

**Figure S3.** Photographs of brown GO aerogel (left) and black rGO aerogel (right), with a diameter of 5.5 cm. The color change from brown GO aerogel to black rGO aerogel indicates the efficient reduction by self-propagating combustion in seconds.

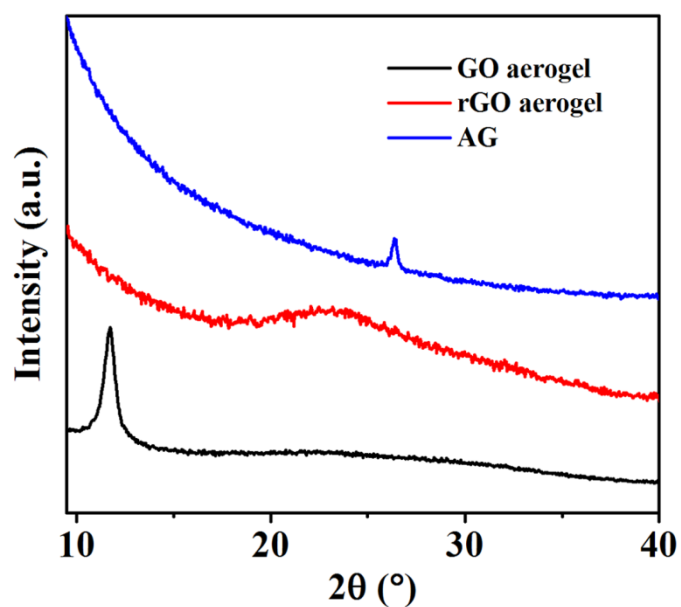

**Figure S4.** XRD patterns of GO aerogel, rGO aerogel and AG. The changed peaks indicated the structural evolution.

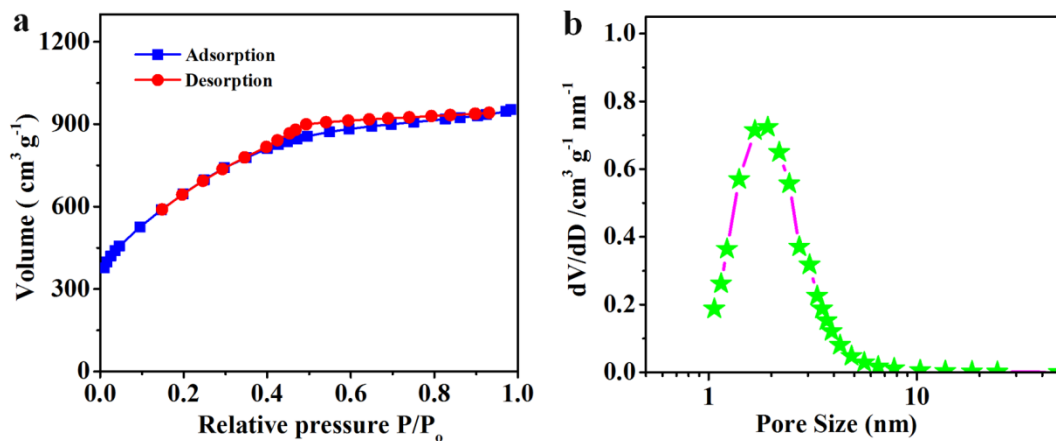

**Figure S5.** a) Nitrogen adsorption and desorption isotherm and b) pore size distribution of AG.

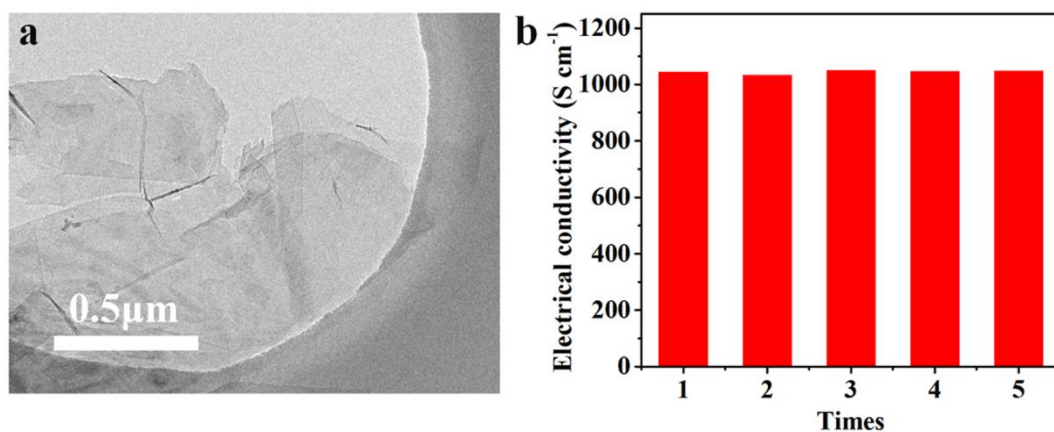

**Figure S6.** a) TEM image of EG nanosheets, showing transparent ultrathin layer of EG. b) Electronic conductivity of EG thin film.

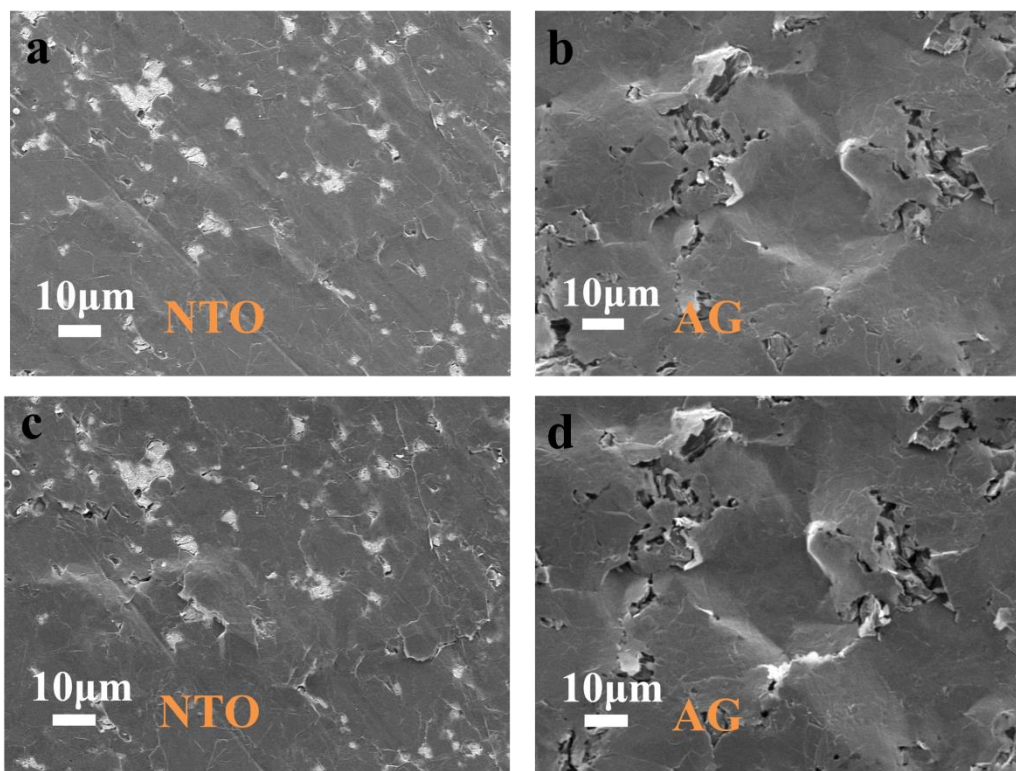

**Figure S7.** Top-view SEM images of NTO and AG microelectrode films (a,b) before and (c,d) after bending as a circle.

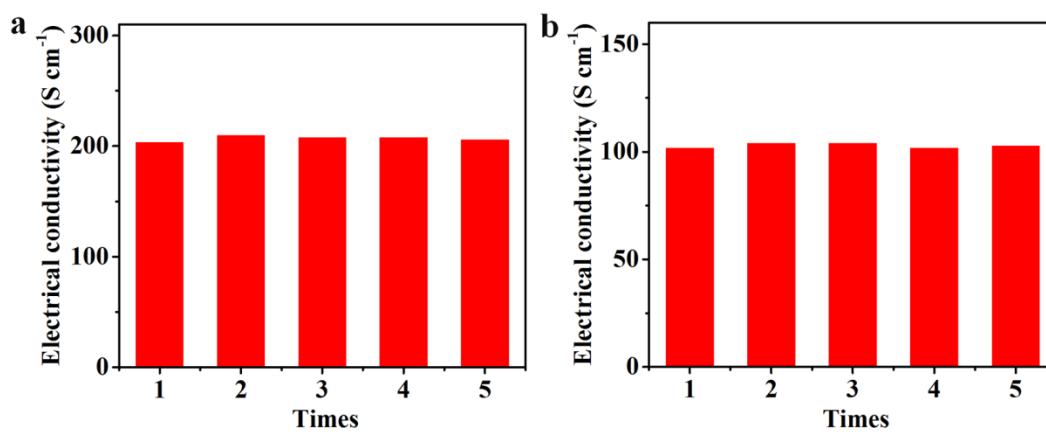

**Figure S8.** Electronic conductivity of a) anode and b) cathode tested for 5 times.

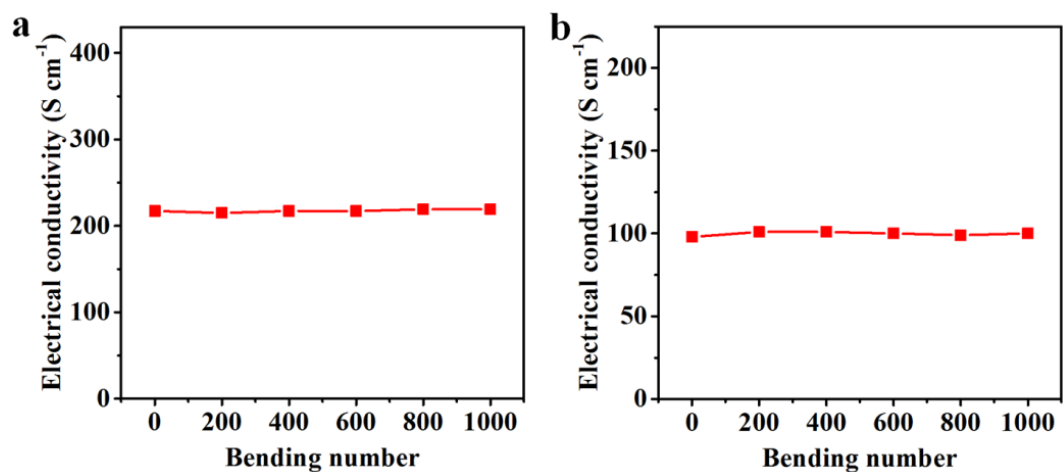

**Figure S9.** Electrical conductivities of NTO (a) and AG (b) microelectrodes as a function as bending number.

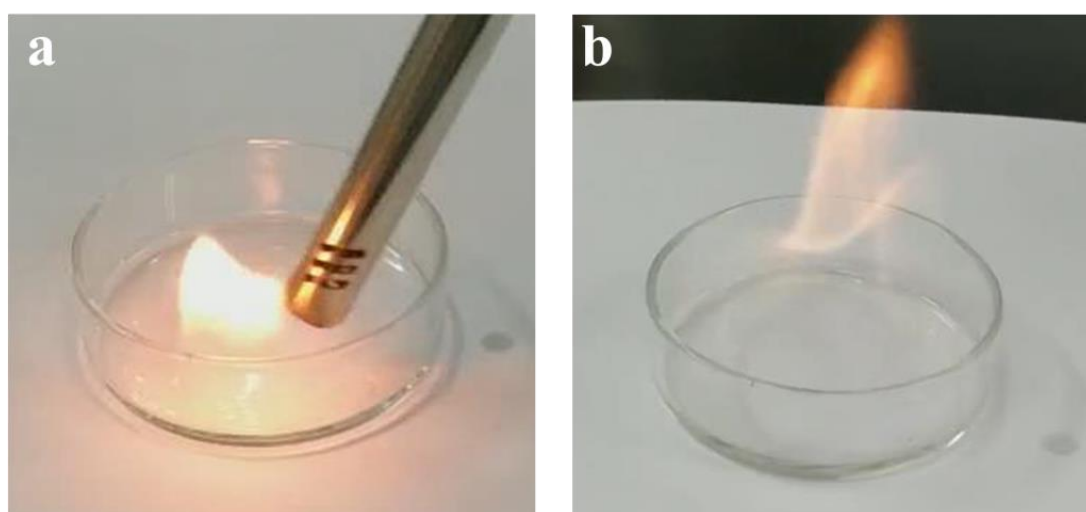

**Figure S10.** (a,b) Flammable test of commercial sodium ion gel electrolyte of NaPF<sub>6</sub> in diglyme mixed with PVDF-HFP.



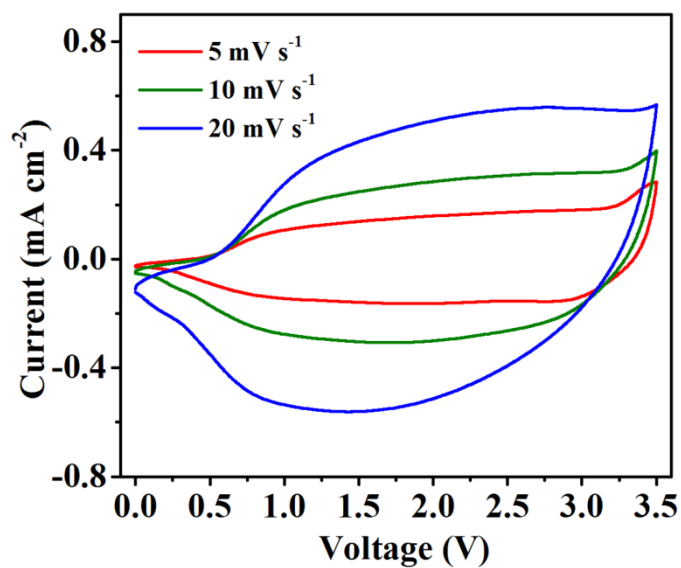

**Figure S11.** CV curves of NTO//AG-NIMCs tested at scan rates from 5 to 20 mV s<sup>-1</sup>.

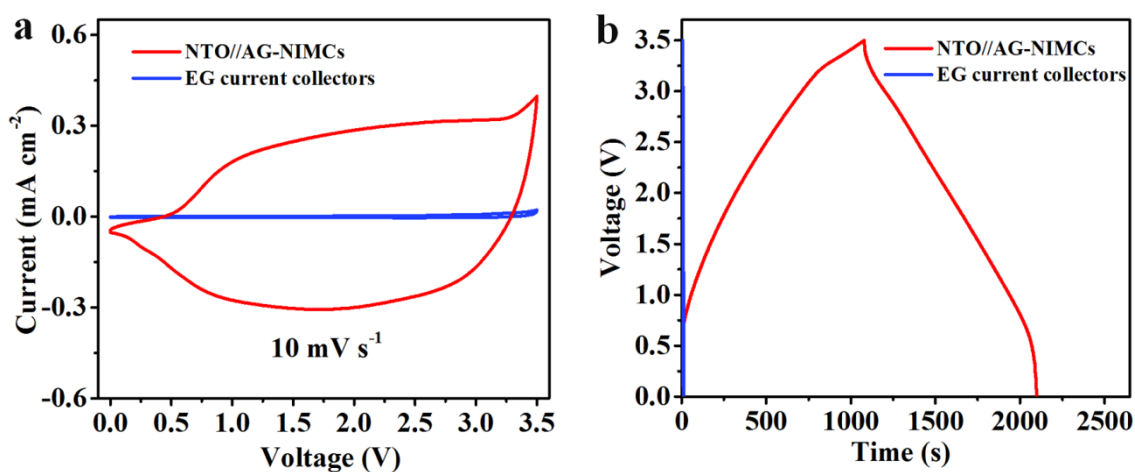

**Figure S12.** a) CV curves tested at 10 mV s<sup>-1</sup> and b) GCD profiles obtained at 0.1 mA cm<sup>-2</sup> of NTO//AG-NIMCs and EG current collectors. These results suggest that contribution of EG to capacitance can be negligible.

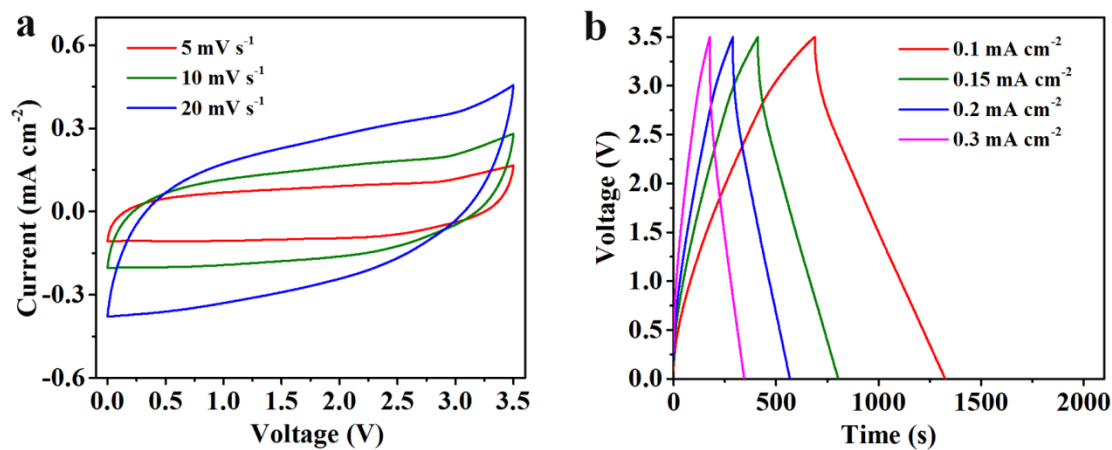

**Figure S13.** a) CV curves recorded from 5 to 20 mV s<sup>-1</sup> and b) GCD profiles tested from 0.1 to 0.3 mA cm<sup>-2</sup> of AG//AG-MSCs.

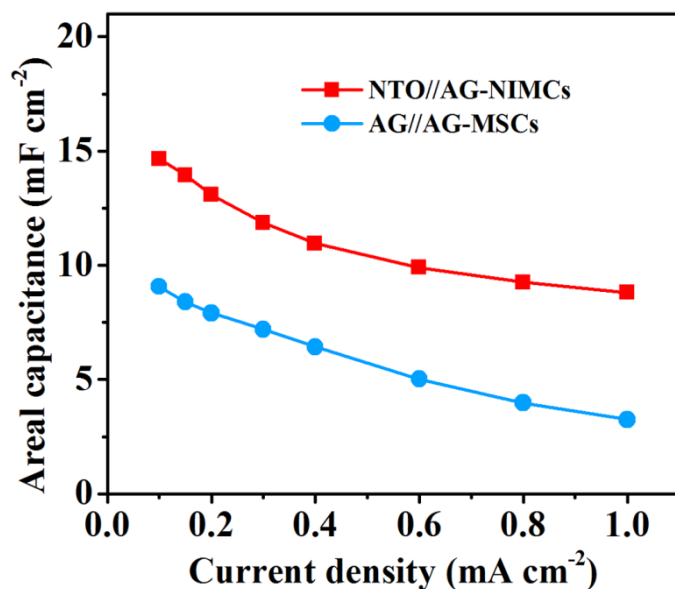

**Figure S14.** Areal capacitance of NTO//AG-NIMCs and AG//AG-MSCs as a function of current density.

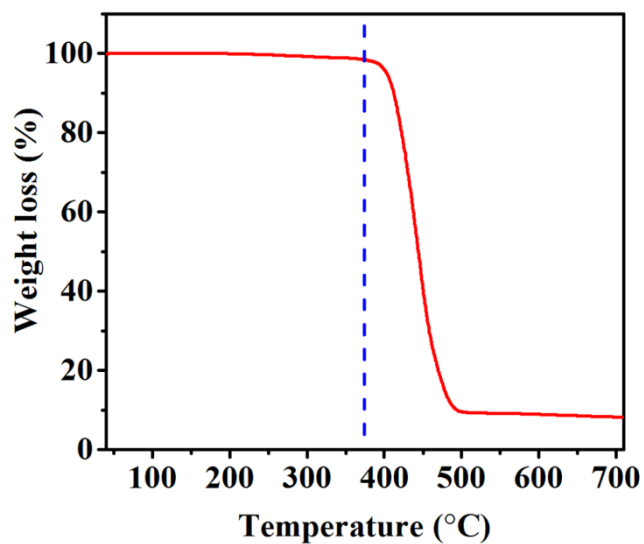

**Figure S15.** TG curve of ionogel electrolyte, showing that the ionogel electrolyte is thermally stable at the temperature of up to 370 °C.

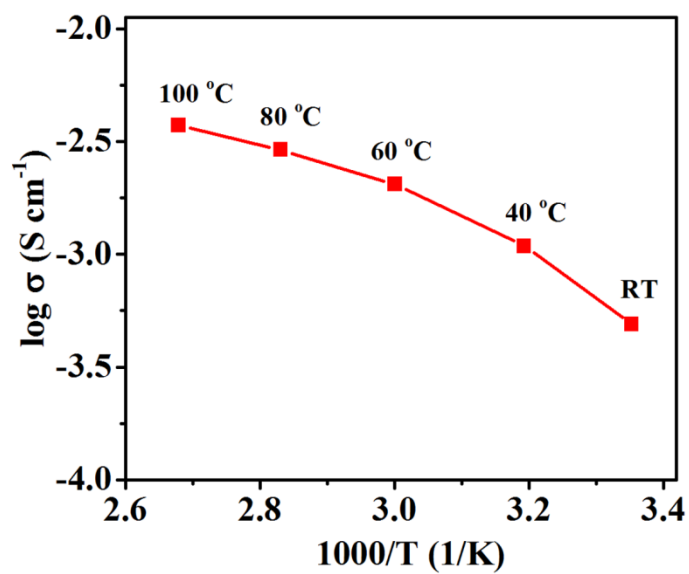

**Figure S16.** Ionic conductivity of ionogel electrolyte as a function of temperature.

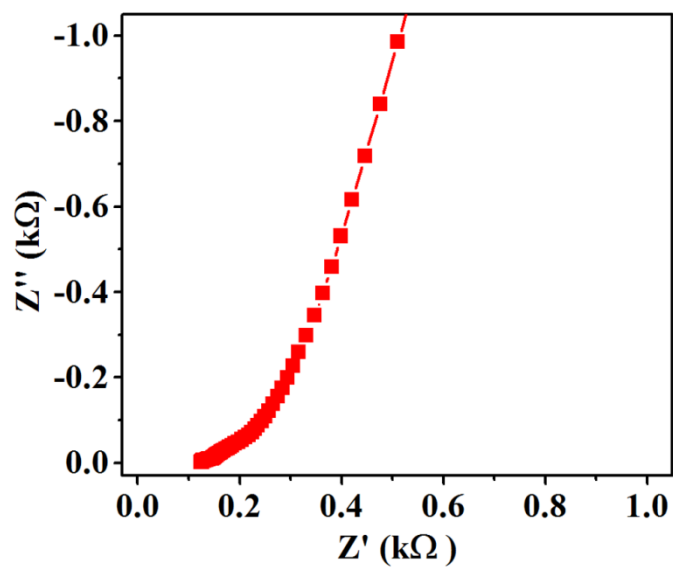

Figure S17. EIS spectrum of NTO//AG-NIMCs-80.

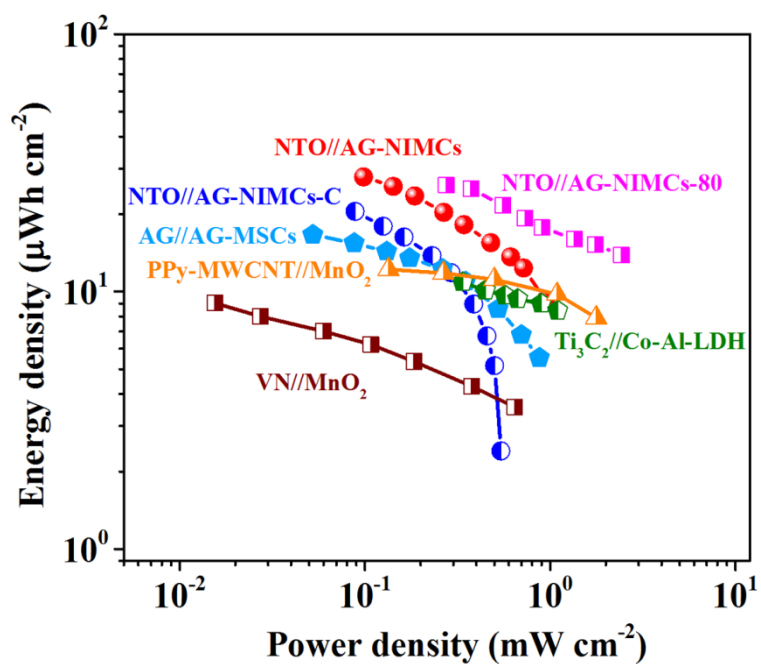

Figure S18. Ragone plots showing areal energy density and power density of NIMCs.

**Table S1. Volumetric electrochemical performance comparison of NTO//AG-NIMCs with reported hybrid MSCs**

| Electrodes                                          | Electrolyte                             | V        | Cv<br>(F cm <sup>-3</sup> ) | Pv (mW<br>cm <sup>-3</sup> ) | Ev (mWh<br>cm <sup>-3</sup> ) | Refs      |
|-----------------------------------------------------|-----------------------------------------|----------|-----------------------------|------------------------------|-------------------------------|-----------|
| <b>NTO//AG</b>                                      | NaTFSI P <sub>14</sub> TFSI<br>PVDF-HFP | 0-3.5    | 19.5                        | 1200                         | 37.1                          | This work |
| <b>MnO<sub>2</sub>-PPy//</b>                        | LiCl/PVA                                | 0-1.6    | /                           | 2570                         | 19.8                          | [1]       |
| <b>V<sub>2</sub>O<sub>5</sub>-PANI</b>              |                                         |          |                             |                              |                               |           |
| <b>Ti<sub>3</sub>C<sub>2</sub>//Co-Al-LD</b>        | 6 M KOH                                 | 0.4-1.45 | /                           | /                            | /                             | [2]       |
| <b>H</b>                                            |                                         |          |                             |                              |                               |           |
| <b>LIG-FeOOH//</b>                                  | LiCl/PVA                                | 0-1.8    | 5.4                         | 2890                         | 2.4                           | [3]       |
| <b>LIG-MnO<sub>2</sub></b>                          |                                         |          |                             |                              |                               |           |
| <b>EG//MP</b>                                       | LiCl/PVA                                | 0-1.8    | 14.6                        | 1460                         | 6.6                           | [4]       |
| <b>VN//Co(OH)<sub>2</sub></b>                       | KOH/PVA                                 | 0-1.5    | 39.7                        | 1750                         | 12.4                          | [5]       |
| <b>Fe<sub>2</sub>O<sub>3</sub>//MnO<sub>2</sub></b> | KOH solution                            | 0-1.2    | 60                          | 14800                        | 12                            | [6]       |
| <b>VN//MnO<sub>2</sub></b>                          | LiTFSI/SiO <sub>2</sub>                 | 0-2      | 38.8                        | 1539                         | 21.6                          | [7]       |
| <b>RGO//GO/PANI</b>                                 | H <sub>3</sub> PO <sub>4</sub> /PVA     | 0-1.2    | 25                          | 25000                        | 4.8                           | [8]       |

V: Voltage; Cv: Volumetric capacitance; Ev: Volumetric energy density; Pv: Volumetric power density. PPy: Polypyrrole; PANI: Polyaniline; PVA: Polyvinyl alcohol; LDH: Layer double hydroxides; LIG: Laser-induced graphene; EG: electrochemically exfoliated graphene; MP: MnO<sub>2</sub> nanosheets/PH1000;

**Table S2. Areal electrochemical performance comparison of NTO//AG-NIMCs with reported hybrid MSCs**

| Electrodes                                 | Electrolyte                             | V        | $C_A$<br>(mF cm <sup>-2</sup> ) | $P_v$ (mW<br>cm <sup>-2</sup> ) | $E_v$ (μWh<br>cm <sup>-2</sup> ) | Refs      |
|--------------------------------------------|-----------------------------------------|----------|---------------------------------|---------------------------------|----------------------------------|-----------|
| NTO//AG                                    | NaTFSI P <sub>14</sub> TFSI<br>PVDF-HFP | 0-3.5    | 14                              | 0.9                             | 27.8                             | This work |
| LIG-FeOOH//<br>LIG-MnO <sub>2</sub>        | LiCl/PVA                                | 0-1.8    | 22                              | 12                              | 9.6                              | [3]       |
| Ti <sub>3</sub> C <sub>2</sub> //Co-Al-LDH | 6M KOH                                  | 0.4-1.45 | 40                              | 1.2                             | 10.8                             | [2]       |
| AC//MnO <sub>2</sub>                       | 0.2M K <sub>2</sub> SO <sub>4</sub>     | 0-1.5    | 2.8                             | -                               | 10                               | [9]       |
| FeHCF-graphene//<br>CuHCF-graphene         | LiCl/PVA                                | 0-1.8    | 20                              | -                               | 9                                | [10]      |
| VN//Co(OH) <sub>2</sub>                    | KOH/PVA                                 | 0-1.5    | 21                              | 0.9                             | 6.5                              | [5]       |
| PPy-MWCNT//MnO <sub>2</sub>                | LiCl/PVA                                | 0-1.6    | 22                              | 2                               | 12                               | [11]      |
| VN//MnO <sub>2</sub>                       | LiTFSI/SiO <sub>2</sub>                 | 0-2      | 16.1                            | 0.6                             | 9                                | [7]       |

$C_A$ : Areal capacitance;  $E_A$ : Areal energy density;  $P_A$ : Areal power density; FeHCF: Fe hexacyanoferrates; CuHCF: Cu hexacyanoferrates;

## References

- [1] Y. Yue, Z. Yang, N. Liu, W. Liu, H. Zhang, Y. Ma, C. Yang, J. Su, L. Li, F. Long, Z. Zou, Y. Gao, *ACS Nano* **2016**, *10*, 11249.
- [2] S. Xu, Y. Dall'Agnesse, G. Wei, C. Zhang, Y. Gogotsi, W. Han, *Nano Energy* **2018**, *50*, 479.
- [3] L. Li, J. Zhang, Z. Peng, Y. Li, C. Gao, Y. Ji, R. Ye, N. D. Kim, Q. Zhong, Y. Yang, H. Fei, G. Ruan, J. M. Tour, *Adv. Mater.* **2016**, *28*, 838.
- [4] X. Shi, Z.-S. Wu, J. Qin, S. Zheng, S. Wang, F. Zhou, C. Sun, X. Bao, *Adv. Mater.* **2017**, *29*, 1703034.

- [5] S. Wang, Z.-S. Wu, F. Zhou, X. Shi, S. Zheng, J. Qin, H. Xiao, C. Sun, X. Bao, *npj 2D Mater. Appl.* **2018**, *2*, 7.
- [6] Z. Liu, X. Tian, X. Xu, L. He, M. Yan, C. Han, Y. Li, W. Yang, L. Mai, *Nano Res.* **2017**, *10*, 2471.
- [7] J. Qin, S. Wang, F. Zhou, P. Das, S. Zheng, C. Sun, X. Bao, Z.-S. Wu, *Energy Storage Mater.* **2019**, *18*, 397.
- [8] Y. Liu, B. Zhang, Q. Xu, Y. Hou, S. Seyedin, S. Qin, G. G. Wallace, S. Beirne, J. M. Razal, J. Chen, *Adv. Funct. Mater.* **2018**, *28*, 1706592.
- [9] C. Shen, X. Wang, S. Li, J. g. Wang, W. Zhang, F. Kang, *J. Power Sources* **2013**, *234*, 302.
- [10] Y. He, P. Zhang, M. Wang, F. Wang, D. Tan, Y. Li, X. Zhuang, F. Zhang, X. Feng, *Mater. Horiz.* **2019**, *6*, 1041.
- [11] J. Gao, C. Shao, S. Shao, F. Wan, C. Gao, Y. Zhao, L. Jiang, L. Qu, *Small* **2018**, *14*, 1801809.
